# Supplementary material for: Effects on Synaptic Plasticity Markers in Fetal Mice and HT22 Neurons upon F-53B Exposure: The Role of PKA Cytoplasmic Retention
Source: PubMed Central journal article supplement — Environ Health (Wash). 2024 Aug 16;2(11):776–85. doi: 10.1021/envhealth.4c00098 (PMC11574628; doi:10.1021/envhealth.4c00098), 2024-08-16
Supplement: eh4c00098_si_001.pdf [file eh4c00098_si_001.pdf]

1 **Supporting Information**

2 **TITLE:** Effects on synaptic plasticity markers in fetal mice and HT22  
3 neurons upon F-53B exposure: the role of PKA cytoplasmic  
4 retention

5 **AUTHORS:** Shen-Pan Li<sup>1</sup>, Hui-Xian Zeng<sup>1</sup>, Shuang-Jian Qin<sup>1</sup>, Qing-Qing Li<sup>2</sup>,  
6 Lu-Yin Wu<sup>1</sup>, Qi-Zhen Wu<sup>1</sup>, Li-Zi Lin<sup>1</sup>, Guang-Hui Dong<sup>1</sup>, Xiao-Wen  
7 Zeng<sup>1\*</sup>

8 **ADDRESS:** <sup>1</sup>Joint International Research Laboratory of Environment and Health,  
9 Ministry of Education, Guangdong Provincial Engineering Technology  
10 Research Center of Environmental Pollution and Health Risk  
11 Assessment, Department of Occupational and Environmental Health,  
12 School of Public Health, Sun Yat-sen University, Guangzhou 510080,  
13 China. <sup>2</sup>Acacia Lab for Implementation Science, Institute for Global  
14 Health, Dermatology Hospital of Southern Medical University,  
15 Guangzhou 510515, China.

16 **JOURNAL:** Environment & Health

17  
18 **Corresponding author:**

19 \*Email: zxw63@mail.sysu.edu.cn.

|    |                                                                        |
|----|------------------------------------------------------------------------|
| 20 | <b>Text S1 Flow cytometry</b>                                          |
| 21 | <b>Text S2 RNA extraction and quantitative real-time PCR (qRT-PCR)</b> |
| 22 | <b>Text S3 Western blot (WB)</b>                                       |
| 23 | <b>Text S4 Molecular docking</b>                                       |
| 24 | <b>Table S1 Primer sequences used for qPCR in this study.</b>          |
| 25 | <b>Table S2 Organ coefficient of fetal mice</b>                        |
| 26 |                                                                        |

27    **Text S1 Flow cytometry**

28    Wash the adherent cells with 1×PBS, add an appropriate amount of pancreatic  
29    enzyme digestion solution, and then collect the cell precipitates. Gently resuspend in  
30    1×PBS, centrifuge at 1000g for 5 minutes, discard the supernatant, and add 195 μL of  
31    the resuspended cells to Annexin V-FITC binding solution. Then, add 5 μL of  
32    Annexin V-FITC and gently mix. Next, add 10 μL of PI and incubate at room  
33    temperature (20-25°C) in the dark for 10-20 minutes. Then, place at 4°C and analyze  
34    using a CytoFLEX-2 (Beckman Coulter, USA).

## **Text S2 RNA extraction and quantitative real-time PCR (qRT-PCR)**

Total RNA was isolated from fetal brain and HT22 cells using TRIzol Reagent (Invitrogen, USA), and its concentration and quality were assessed with a Nanodrop 2000 (Thermo Fisher, USA). First-strand cDNA synthesis was carried out using the ReverTra Ace® qPCR RT Kit (TOYOBO, Japan), utilizing a 500 ng aliquot of total RNA. Quantitative real-time PCR (qRT-PCR) was conducted using SYBR® Green Realtime PCR Master Mix (TOYOBO, Japan) and analyzed using a QuantStudio7 Flex (Thermo Fisher, USA). Gapdh was used as the housekeeping gene. The PCR protocol was as follows: 95°C for 1 minute, followed by 40 cycles of 95°C for 15 seconds and 60°C for 1 minute.

### **Text S3 Western blot (WB)**

The Cytoplasmic and Nuclear Proteins Extraction Kit (Beyotime, China) was used to extract the cytoplasmic and nuclear proteins of HT22 cells. Cell pellets were collected and resuspended in 200  $\mu$ L of Cytoplasmic Protein Extraction Reagent A, with 1mmol/L phenylmethanesulfonyl fluoride (PMSF) added. The cells were vortexed for 5 seconds and then placed at 4  $^{\circ}$ C for 15 min. Subsequently, 10  $\mu$ L of Reagent B was added to the cells, they were then vortexed vigorously for 5 seconds, and the supernatant was identified as the extracted cytoplasmic protein. Cell pellets were treated with Nuclear Protein Extraction Reagent containing 1mmol/L PMSF, vortexed vigorously for 30 min at 4  $^{\circ}$ C, and the supernatant was collected as the extracted nuclear protein.

The total proteins from fetal brain, placenta, and HT22 cells were separately quantified using Lysis Buffer (Beyotime, China). Quantification of the total, cytoplasmic, and nuclear proteins was performed using the BCA Protein Assay Kit (Beyotime, China). Protein samples were mixed with loading buffer, heated to 100  $^{\circ}$ C for 7 min, then electrophoresed on 12% SDS-PAGE, and transferred to PVDF membranes. Subsequently, the membranes were blocked with the Antibody Blocking Solution (Beyotime, China) at room temperature for 90 min. The membranes were incubated with the primary antibody (1:1000) overnight at 4  $^{\circ}$ C, followed by the secondary antibody (1:5000, Abcam, USA) at room temperature for 90 min. The blots were visualized using ChemiDoc Touch (BIO-RAD, USA). The densitometry of the blots was performed using ImageJ software.

#### **Text S4 Molecular docking**

We retrieved the crystal structures of CREB1 (PDB ID: 5ZKO) and PKA (PDB ID: 2H77) from the RCSB Protein Data Bank (<http://www.rcsb.org/pdb>). The 2D structures of 6:2 Cl-PFAEs (Compound CID: 22568738) and 8:2 Cl-PFAEs (Compound CID: 50851128) were obtained from the PubChem database (<https://pubchem.ncbi.nlm.nih.gov/>) and then converted to 3D structures by Chem3D 20.0. AutoDock 1.5.7 was employed to ascertain the binding modes of Cl-PFAEs to PKA and CREB1. These protein files were prepared by removing water molecules and other ligands, adding polar hydrogens, and rendering the structure of the ligands in PDB format. During docking, the target proteins remained rigid, while all torsional bonds within each ligand were made flexible. The grid box encompassed the entire binding site. Docking utilized the Lamarckian genetic algorithm. OpenBabel 2.4.1 facilitated the conversion of files from the .pdbqt suffix to the .pdb suffix. Finally, Discovery Studio 4.5 Client and PyMOL 2.4.0 were used to visualize the docking results in both 2D and 3D formats.

86 **Table S1 Primer sequences used for qPCR in this study.**

| Full name                                 | Gene      | Sequences of primers 5'-3' |
|-------------------------------------------|-----------|----------------------------|
| GAPDH                                     | M-GAPDH-f | GCATCTTCTTGTGCAGTGCC       |
|                                           | M-GAPDH-r | TACGGCCAAATCCGTTTACA       |
| Adenylate cyclase 1                       | M-Adcy1-f | TCGTGTCCTATGCCTTGCTG       |
|                                           | M-Adcy1-r | CTCTGTCAAGATCCGCACGA       |
| Cathelicidin antimicrobial peptide        | M-cAMP-f  | ACAGCCCTTTCGGTTCAAGA       |
|                                           | M-cAMP-r  | TTCACCAATCTTCTCCCCACC      |
| Protein lysine acetyltransferase          | M-PKA-f   | CAACTTCCCGTTCCTGGTCA       |
|                                           | M-PKA-r   | AGGTCCCGGTAGATGAGGTC       |
| cAMP responsive element binding protein 1 | M-CREB1-f | AGGGGTGCCAAGGATTGAAG       |
|                                           | M-CREB1-r | CTTGTTTGCTGGGCACTAGA       |
| Brain derived neurotrophic factor         | M-BDNF-f  | CGACGACATCACTGGCTGACAC     |
|                                           | M-BDNF-r  | GAGGCTCCAAAGGCACTTGACTG    |
| Synaptophysin                             | M-SYP-f   | TGGTTTGGAGGGTGAGCGAAATG    |
|                                           | M-SYP-r   | AGGGCAGAGAAAGGGTGGAGAAG    |
| Growth associated protein 43              | M-GAP43-f | CCGAGGCTGACCAAGAACATGC     |
|                                           | M-GAP43-r | GGTAGGAGAGGACAGGCTCACAC    |
| Postsynaptic density protein-95           | M-PSD95-f | GCTATGAGACGGTGACGCAGATG    |
|                                           | M-PSD95-r | GTTGGCACGGTCTTTGGTAGGC     |

87

88

89 **Table S2. Organ coefficient of fetal mice**

| Groups             | Fetal brain     |
|--------------------|-----------------|
| Control            | $1.41 \pm 0.16$ |
| 4 $\mu\text{g/L}$  | $1.35 \pm 0.22$ |
| 40 $\mu\text{g/L}$ | $1.18 \pm 0.07$ |

90 Note: Values are mean  $\pm$  SEM.  $n \geq 3$ .
